# Supplementary material for: Microplasma-assisted bottom-up synthesis of graphene nanosheets with superior sodium-ion storage performance
Source: Royal Society of Chemistry journal article supplement (doi:10.1039/c6ta00743k), 2016-01-01
Supplement: c6ta00743k1.pdf [file c6ta00743k1.pdf]

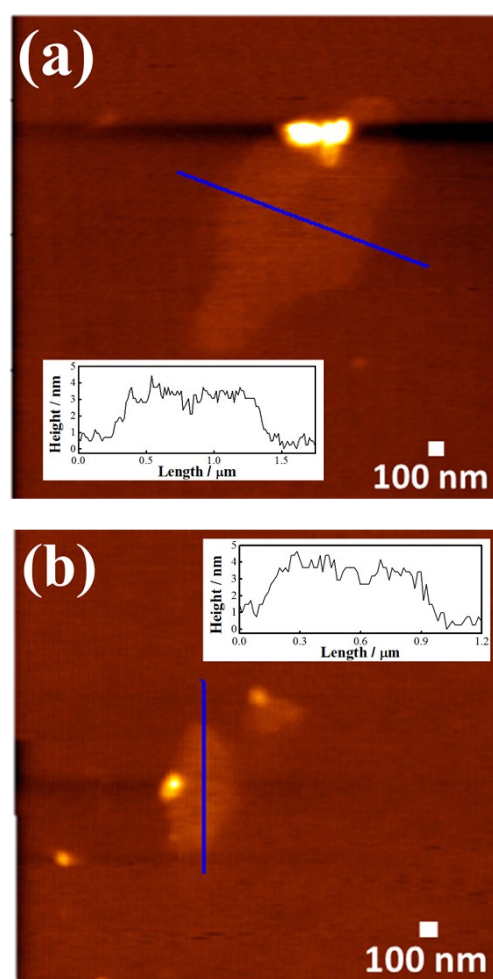

**Figure S1.** AFM data of the synthesized (a) MPGNS and (b) RGO samples.

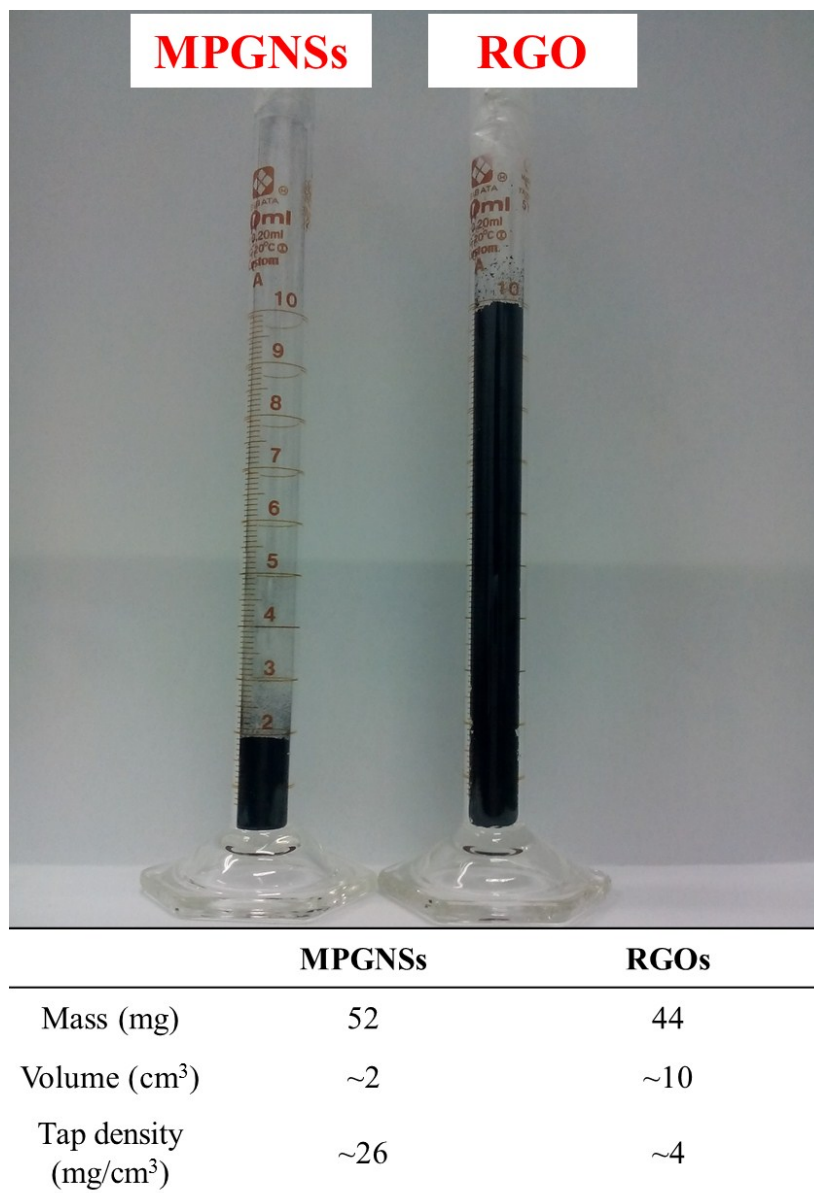

**Figure S2.** Tap densities of the synthesized MPGNS and RGO samples.

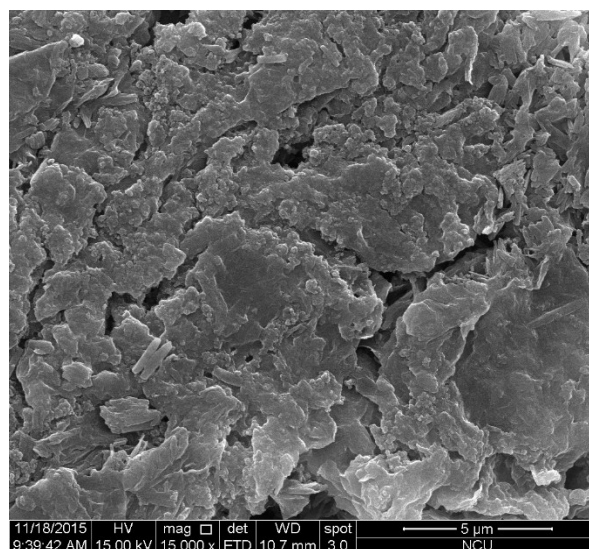

**Figure S3.** SEM micrograph of the MPGNS electrode after 500 charge–discharge cycles.
